# Supplementary material
Source: PubMed Central journal article supplement (PMC153660)

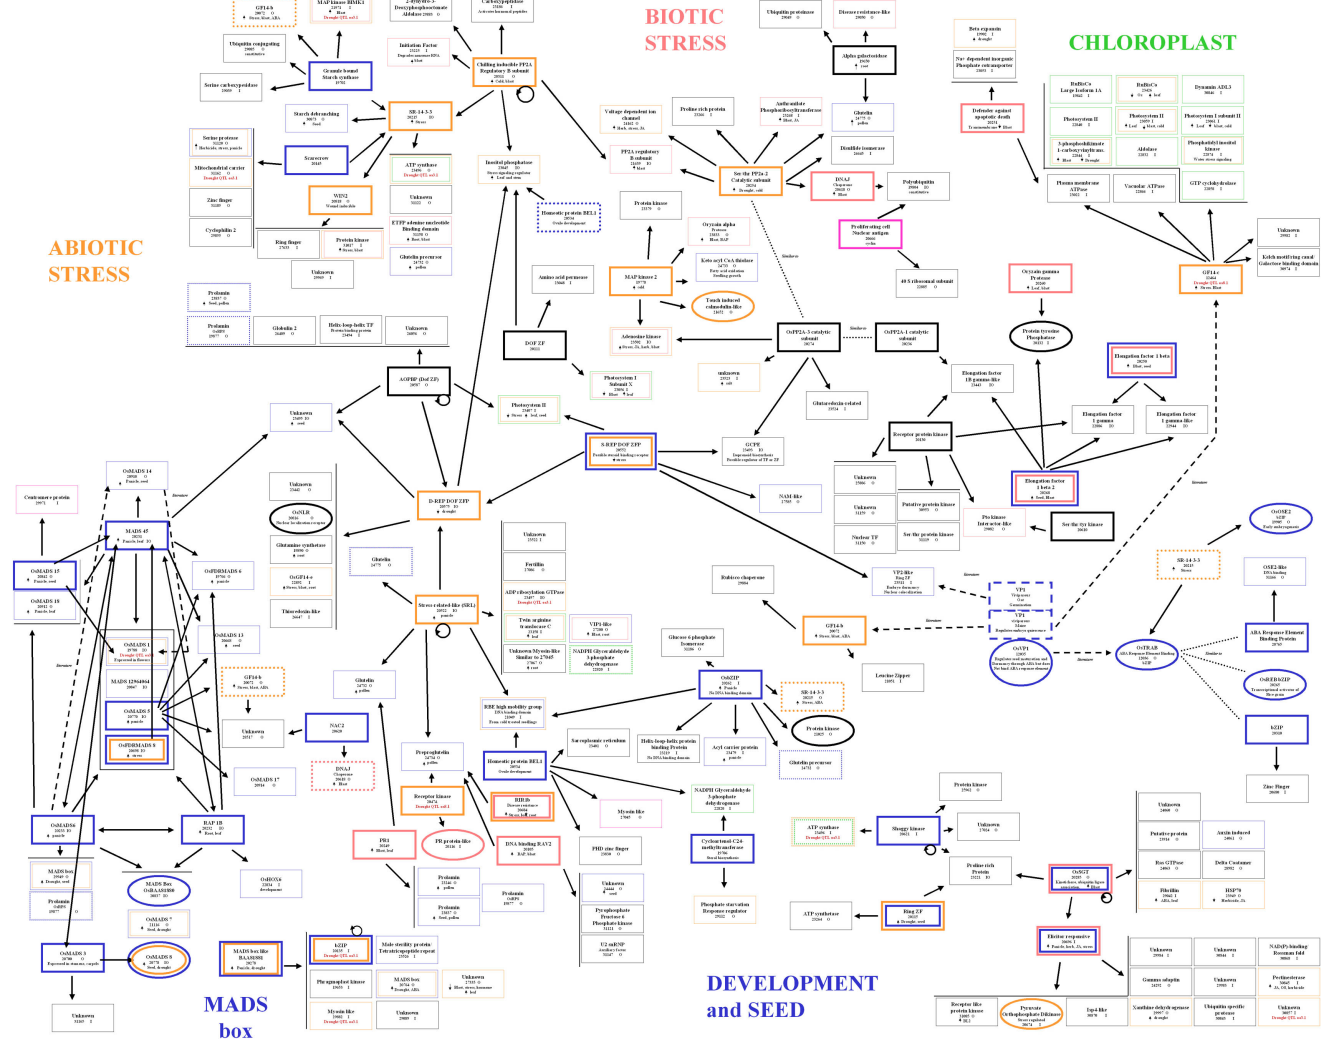

Supplement: pnas_0737574100_5.pdf [file pnas_0737574100_5.pdf]
